# Supplementary material
Source: publisher figshare collection journal article supplement (https://gsapubs.figshare.com/ndownloader/files/39640024)
Supplement: Supplementary file 1 [file 39640024]

## Sheet: Table 8
Table S8. SHRIMP Zircon U-Pb isotopic data from the eclogite in Nuomuhong area, EKOB.
Sample	206Pbc(%)	U(ppm)	Th(ppm)	232Th/238U	206Pb*(ppm)	Age(206Pb/238U)		207Pb*/206Pb*	±%	207Pb*/235U	±%(err)	206Pb*/238U	±%(err)
LH3-1.1	5.46	12.58	0.25	0.02	0.74	404	±15	0.036	38	0.32	38	0.0647	3.8
LH3-2.1	2.82	13.11	0.97	0.08	0.679	367	±15	0.049	25	0.394	25	0.0586	4.1
LH3-3.1	1.08	11.21	1.16	0.11	0.671	429	±15	0.059	26	0.56	26	0.0689	3.7
LH3-4.1	0	5.68	0.3	0.05	0.366	466	±21	0.085	9.1	0.88	10	0.0749	4.6
LH3-5.1	2.61	6.77	0.17	0.03	0.402	420	±18	0.048	33	0.44	34	0.0673	4.5
LH3-6.1	0	3.06	0.57	0.19	0.191	468	±28	0.121	9	1.26	11	0.0753	6.1
LH3-7.1	0	3.59	0.3	0.09	0.22	460	±27	0.107	16	1.09	18	0.0739	6
LH3-7.2	2.87	7.86	0.47	0.06	0.474	425	±19	0.063	27	0.59	27	0.0682	4.6
LH3-8.1	0.72	6.74	0.46	0.07	0.394	422	±19	0.076	22	0.7	22	0.0676	4.7
LH3-9.1	2.13	8.03	0.24	0.03	0.471	417	±19	0.048	45	0.44	45	0.0668	4.8
LH3-10.1	33.54	3.75	1.75	0.48	0.407	517	±72	0.21	60	2.4	62	0.083	15
LH3-11.1	3.67	38.51	3.62	0.1	2.29	416.2	±9.4	0.034	36	0.31	36	0.0667	2.3
LH3-12.1	0	52.41	1.2	0.02	2.97	415.7	±6.9	0.064	8.7	0.584	8.9	0.0666	1.7
LH3-13.1	1.51	32.3	1.05	0.03	1.92	426	±11	0.05	33	0.47	33	0.0683	2.8
LH3-14.1	0	5.33	0.27	0.05	0.347	471	±26	0.175	7.5	1.83	9.4	0.0759	5.8
LH3-15.1	3.5	13.44	0.64	0.05	0.862	448	±16	0.034	28	0.333	28	0.072	3.6
LH3-16.1	3.09	24.16	0.44	0.02	1.43	416	±15	0.033	63	0.3	63	0.0666	3.6
LH3-17.1	0	3.65	0.08	0.02	0.222	441	±25	0.1	11	0.97	12	0.0709	5.8
LH3-18.1	3.26	6.12	0.51	0.09	0.445	507	±24	0.099	19	1.11	20	0.0818	5
LH3-19.1	2.85	18.21	1.89	0.11	1.08	420	±14	0.037	49	0.34	49	0.0673	3.4
LH3-20.1	1.26	99.98	21.79	0.23	5.75	412.8	±4.8	0.048	8.8	0.437	8.9	0.0661	1.2
LH3-21.1	1.17	41.58	1.51	0.04	2.39	412.7	±7.1	0.053	8.3	0.486	8.5	0.0661	1.8
LH3-22.1	2.44	32.57	11.82	0.38	1.86	404	±10	0.042	35	0.37	35	0.0647	2.6
LH3-23.1	0.19	57.2	1.8	0.03	3.25	412.1	±7.2	0.059	6.9	0.537	7.2	0.066	1.8
LH3-24.1	1.68	20.32	0.25	0.01	1.16	408	±11	0.055	12	0.494	12	0.0653	2.7
LH3-24.2	2.7	20.34	0.66	0.03	1.11	385.3	±9.9	0.04	12	0.342	13	0.0616	2.6
LH3-25.1	3.48	25.52	0.4	0.02	1.49	409	±10	0.041	22	0.367	22	0.0656	2.5
LH3-26.1	2.74	48.07	4.48	0.1	2.93	430	±21	0.047	51	0.45	51	0.069	5.1
LH3-27.1	1.14	103.58	2.15	0.02	6.7	462.7	±5.1	0.05	5.3	0.517	5.4	0.0744	1.1
LH3-28.1	3.25	120.7	5.64	0.05	7.73	449	±16	0.05	41	0.5	41	0.0721	3.7
LH3-29.1	0	10.28	0.48	0.05	0.633	460	±16	0.102	5.5	1.039	6.5	0.074	3.5
LH3-30.1	1.07	19.07	1.42	0.08	1.1	414	±11	0.061	12	0.553	13	0.0663	2.7
LH3-31.1	0	13.8	1.13	0.08	0.859	457	±14	0.085	5.4	0.864	6.3	0.0735	3.1
LH3-32.1	1.72	241.68	3.68	0.02	14.8	436.2	±9.2	0.046	19	0.439	20	0.07	2.2
LH3-33.1	3.11	25.92	3.07	0.12	1.56	423.1	±9.8	0.043	19	0.401	19	0.0678	2.4
LH3-34.1	0	17.33	1.42	0.08	1.01	423	±13	0.07	6.6	0.655	7.3	0.0678	3.1
LH3-35.1	3.14	49.57	1.5	0.03	3.11	441	±23	0.047	65	0.46	65	0.0707	5.5
LH3-36.1	0.63	46.87	0.9	0.02	2.82	433.4	±7.1	0.052	8.8	0.494	9	0.0695	1.7
LH3-37.1	2.45	57.15	4.34	0.08	3.54	437.9	±7.4	0.038	20	0.372	20	0.0703	1.8
LH3-38.1	3.1	24.51	0.34	0.01	1.45	416.7	±9.9	0.038	26	0.352	26	0.0668	2.4
LH3-39.1	3.78	20.34	1.29	0.07	1.23	421	±11	0.029	27	0.272	27	0.0675	2.6
LH3-40.1	1.76	36.35	2.54	0.07	2.06	404.9	±8.0	0.043	19	0.385	19	0.0648	2
LH3-41.1	2.9	17.42	14.53	0.86	1.02	413	±11	0.044	16	0.403	16	0.0662	2.7
LH3-42.1	4.43	5.27	0.15	0.03	0.334	439	±26	0.038	58	0.37	59	0.0705	6.1
LH3-43.1	2.19	48.48	4.59	0.1	2.72	399.5	±7.5	0.042	13	0.367	13	0.0639	1.9
Errors are 1-sigma; Pbc and Pb* indicate the common and radiogenic portions, respectively
Error in Standard calibration was 0.14% ( not included in above errors but required when comparing data from different mounts).
Ages are corrected with Common Pb using measured 204Pb.
